# Supplementary material for: Long‐Term Esthetically Depigmented Gingiva in a Short Operative Duration, Using Two Modes of 940 nm Diode Lasers—A Randomized Clinical Trial
Source: Hindawi journal article supplement (doi:10.1155/2022/8215348), 2022-01-01
Supplement: f1 [file 8215348.f1.pdf]

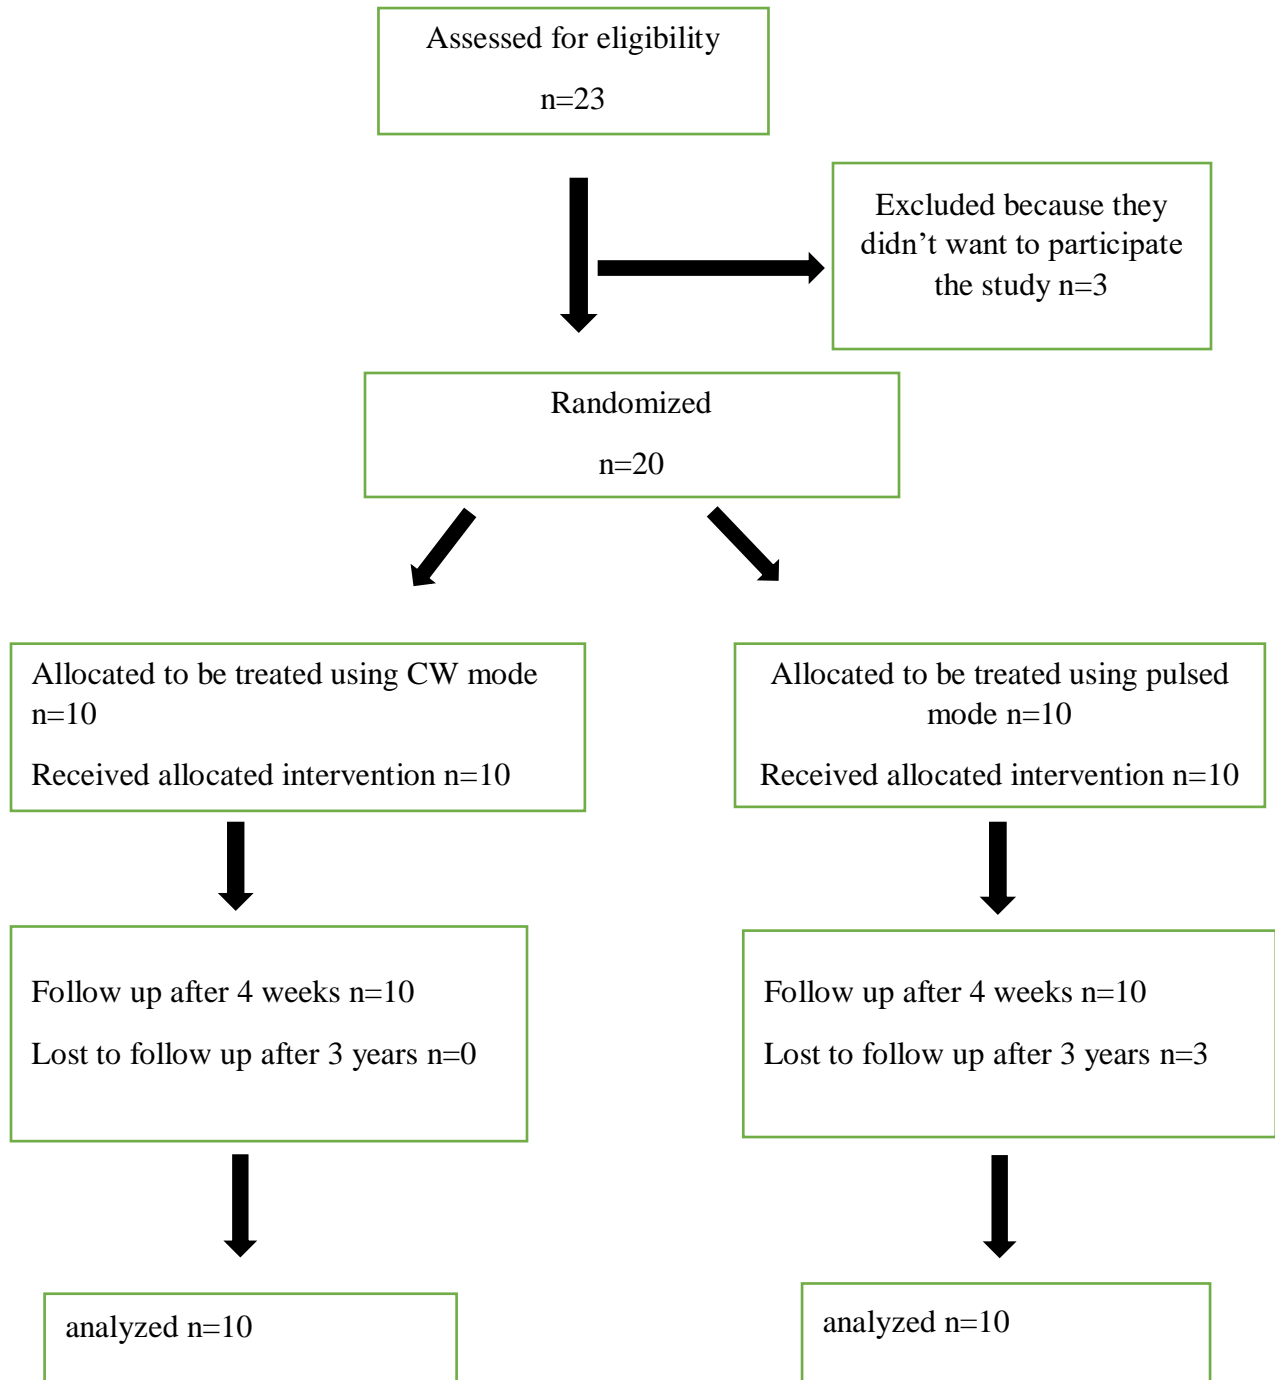

**Appendix Figure 1.** The consort flow chart of patients` eligibility, allocation and analysis

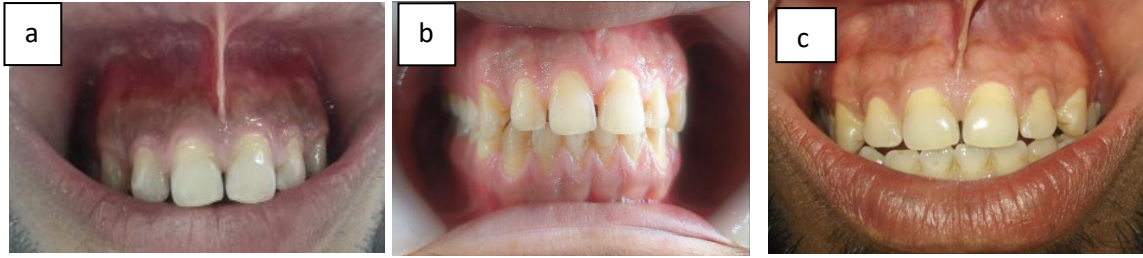

**Appendix Figure 2.** Represents CW group treatment of upper arch (A) Pre-operative (B) 4<sup>th</sup> week postoperatively (C) 3 years postoperatively

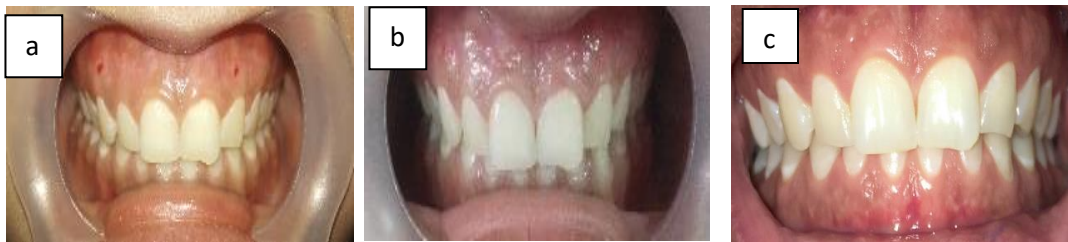

**Appendix Figure 3.** Represents pulsed group treatment of upper arch (A) Pre-operative view (B) 4<sup>th</sup> week postoperatively (C) 3 years postoperatively
